# Supplementary material for: A SNP profiling panel for sample tracking in whole-exome sequencing studies
Source: PubMed Central journal article supplement (PMC3978886; doi:10.1186/gm492), 2013-09-27

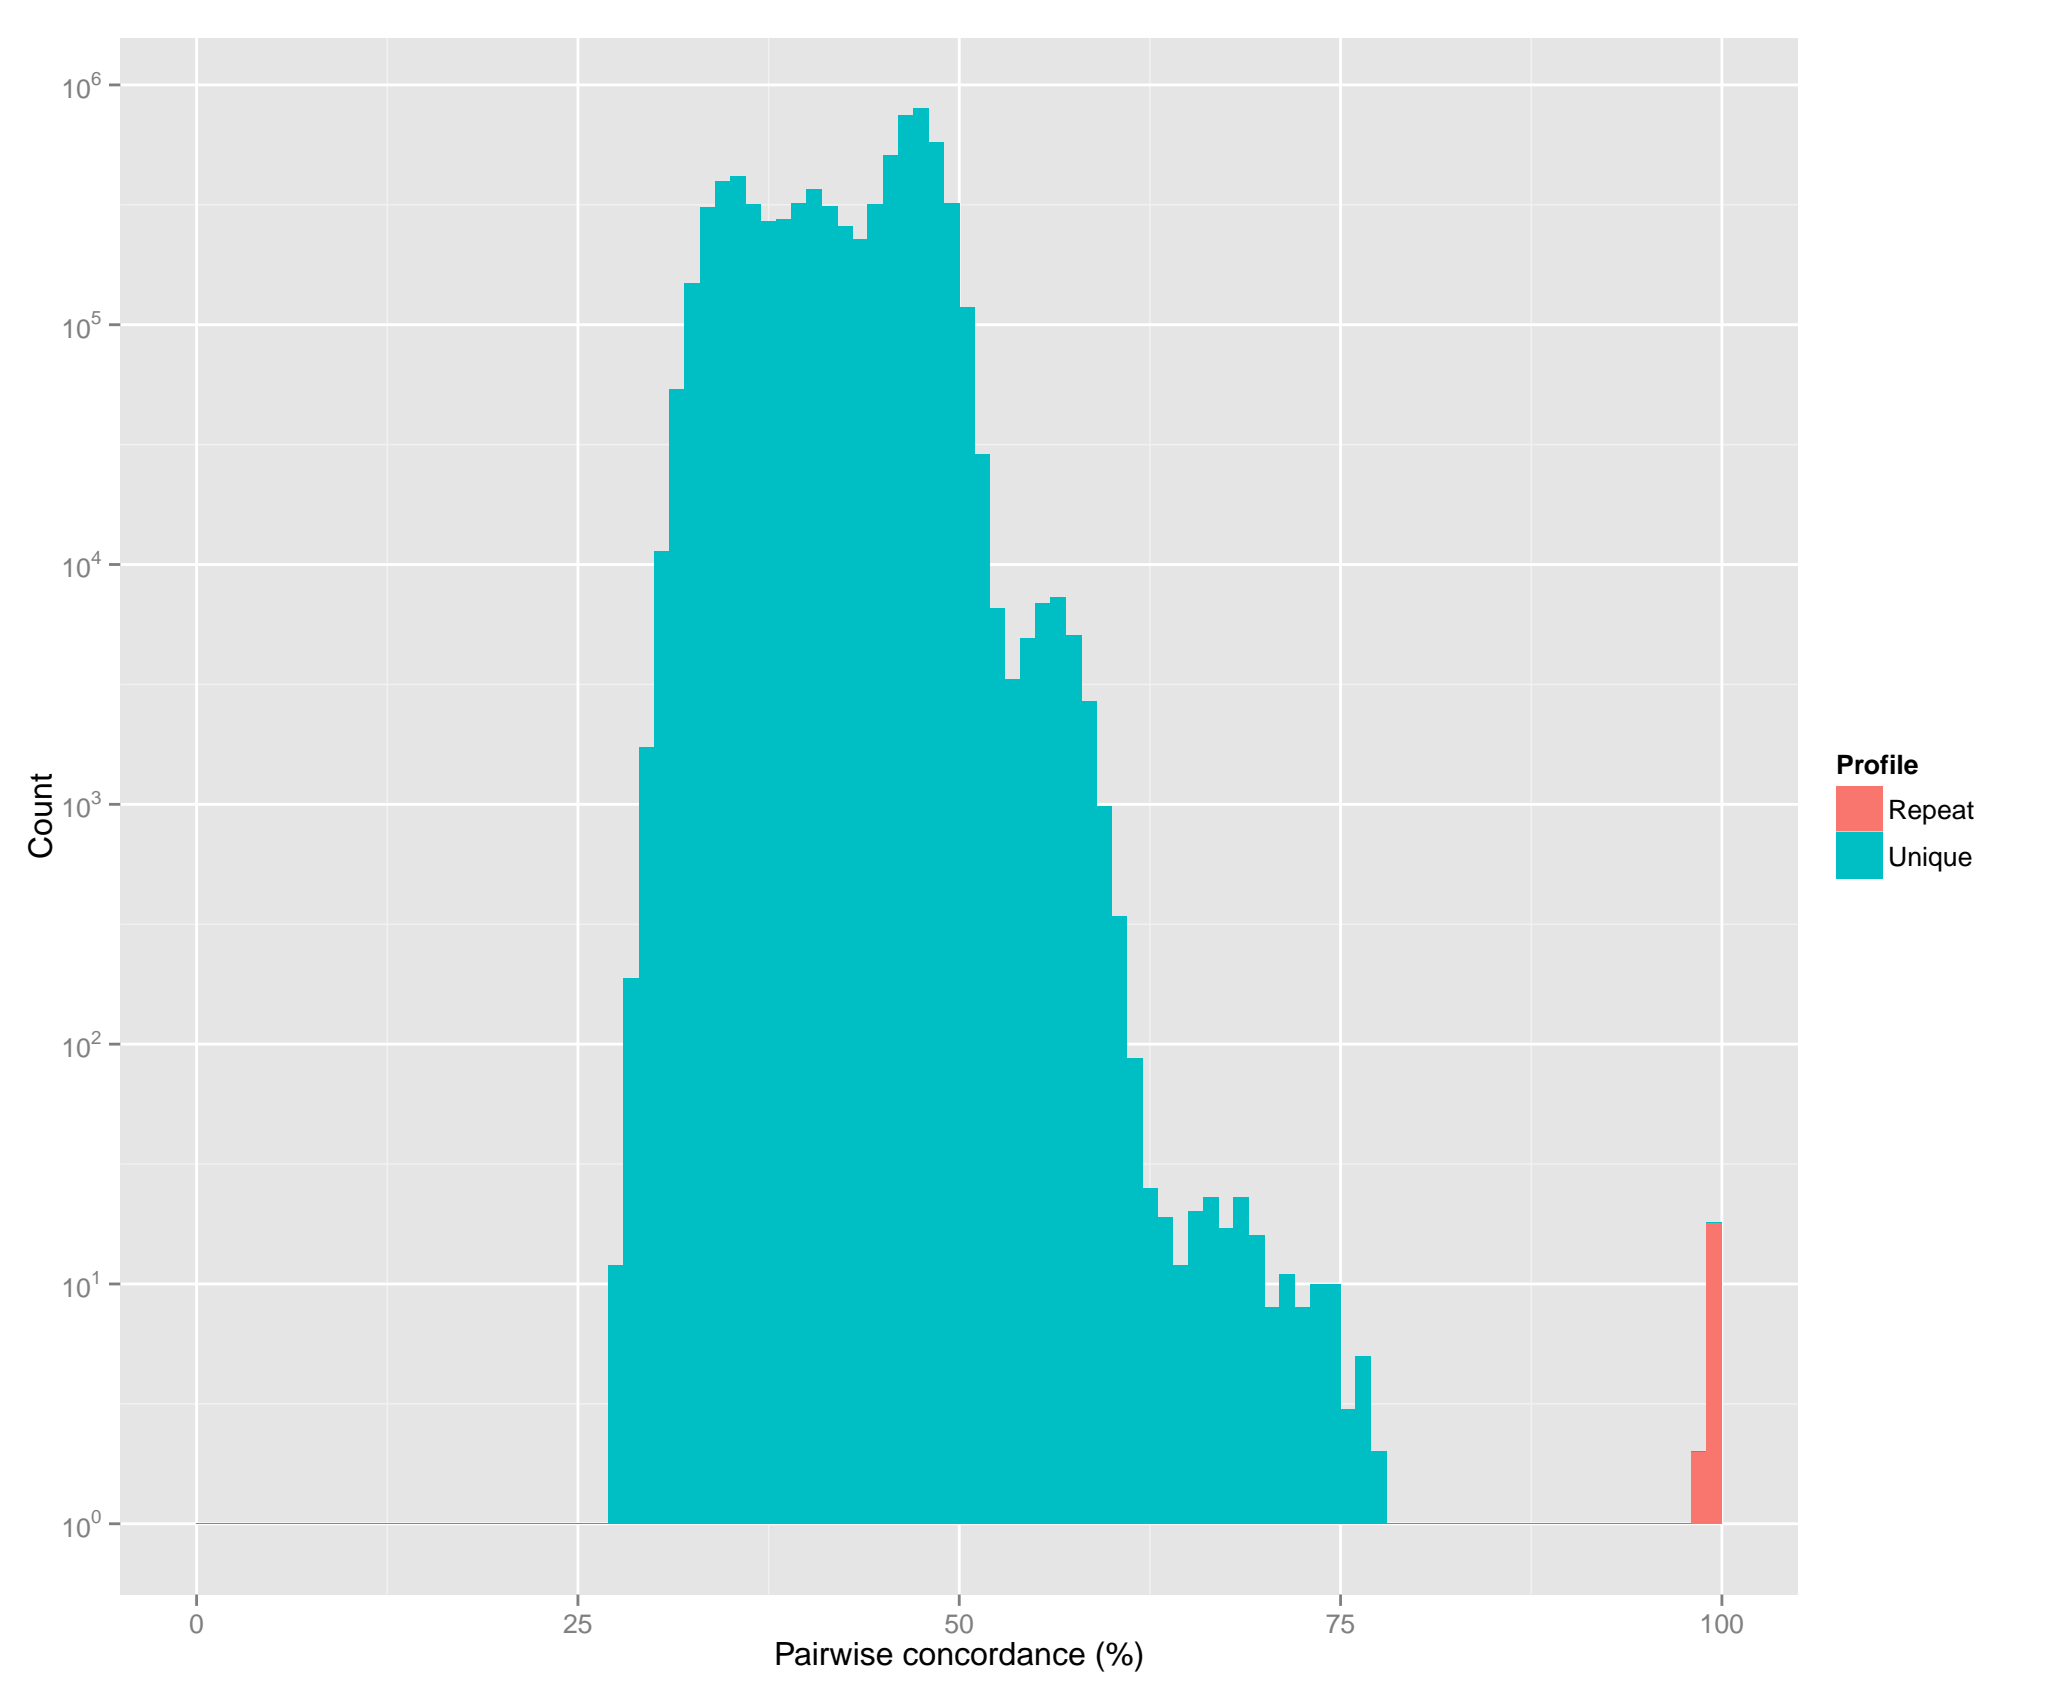

Supplement: gm492-S2.pdf [file gm492-S2.pdf]
